# Supplementary material for: Synthesis, Crystal and Electronic Structures, Nonlinear Optical Properties, and Magnetic Properties of Two Thiophosphates: KInP2S7 and KCrP2S7
Source: MDPI journal article supplement (doi:10.3390/cryst12111505), 2022-10-22
Supplement: s1 [file s1]

Archive with 1 entries (1 files):
- crystals-1958385-supplementary.pdf
