# Supplementary material for: Synthesis, Crystal and Electronic Structures, Nonlinear Optical Properties, and Magnetic Properties of Two Thiophosphates: KInP2S7 and KCrP2S7
Source: MDPI journal article supplement (doi:10.3390/cryst12111505), 2022-10-22
Supplement: s1 [file s1 › crystals-1958385-supplementary.pdf]

# Synthesis, crystal and electronic structures, nonlinear optical properties, and magnetic properties of two thiophosphates: $\text{KInP}_2\text{S}_7$ and $\text{KCrP}_2\text{S}_7$ .

Craig Cropek <sup>1</sup>, Vivian Nguyen <sup>1</sup>, Santosh Karki Chhetri <sup>2</sup>, Jin Hu <sup>2,3</sup>, Shengping Guo <sup>4</sup>, Jian Wang <sup>1,\*</sup>

<sup>1</sup> Department of Chemistry and Biochemistry, Wichita State University, Wichita, Kansas 67260, United States

<sup>2</sup> Materials Science and Engineering Program, Institute for Nanoscience and Engineering, University of Arkansas, Fayetteville, Arkansas 72701, USA

<sup>3</sup> Department of Physics, University of Arkansas, Fayetteville, Arkansas 72701, USA

<sup>4</sup> School of Chemistry and Chemical Engineering, Yangzhou University, Yangzhou, Jiangsu 225002, P. R. China

\* Correspondence: jian.wang@wichita.edu

1. **Figure S1.** Powder X-ray diffraction results of  $\text{KInP}_2\text{S}_7$ .
2. **Figure S2.** 3D isosurfaces of the electron localization function (ELF) for  $\text{KInP}_2\text{S}_7$  with  $\eta=0.75$ , K: green, In: pink, P: black, S: yellow.
3. **Figure S3.** Kubelka-Munk diffuse reflectance spectrum of  $\text{KInP}_2\text{S}_7$ .
4. **Figure S4.** Tauc plots for allowed direct and indirect transitions of  $\text{KInP}_2\text{S}_7$ .
5. **Figure S5.** SHG intensities of  $\text{KInP}_2\text{S}_7$  and  $\text{AgGaS}_2$  @2.09  $\mu\text{m}$  measured at variable particle size samples.
6. **Table S1.** LDT measurement results of  $\text{KInP}_2\text{S}_7$  and  $\text{AgGaS}_2$  @ 1064 nm measured at samples of particle size of 225  $\mu\text{m}$ .

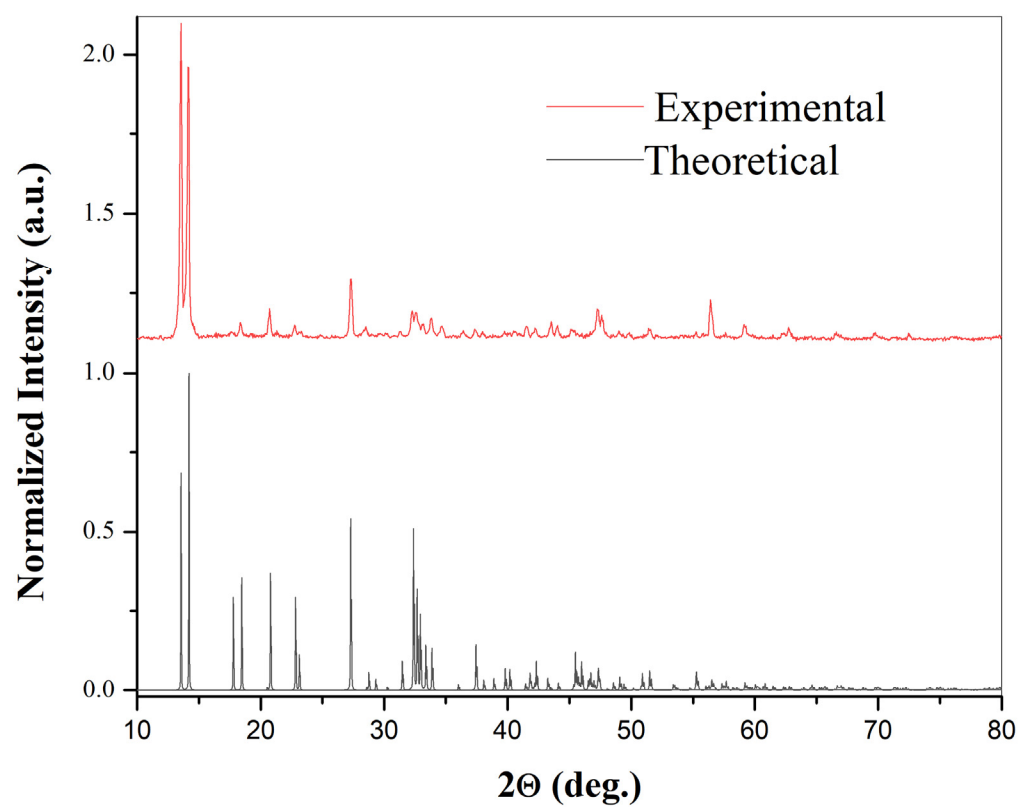

**Figure S1.** Powder X-ray diffraction results of KInP<sub>2</sub>S<sub>7</sub>.

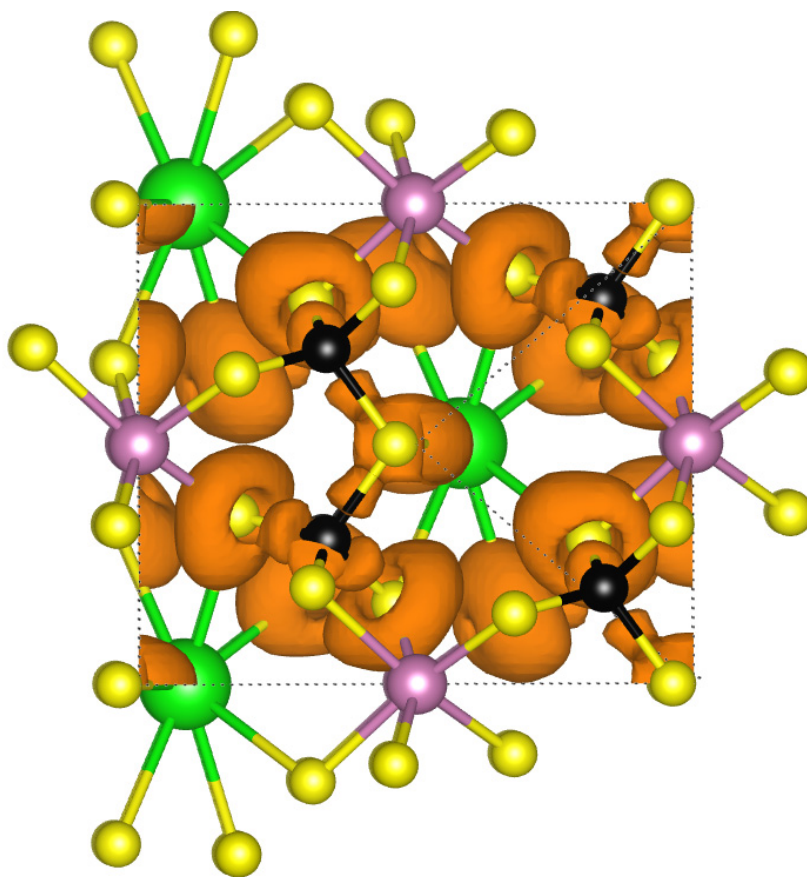

**Figure S2.** 3D isosurfaces of the electron localization function (ELF) for KInP<sub>2</sub>S<sub>7</sub> with  $\eta=0.75$ , K: green, In: pink, P: black, S: yellow.

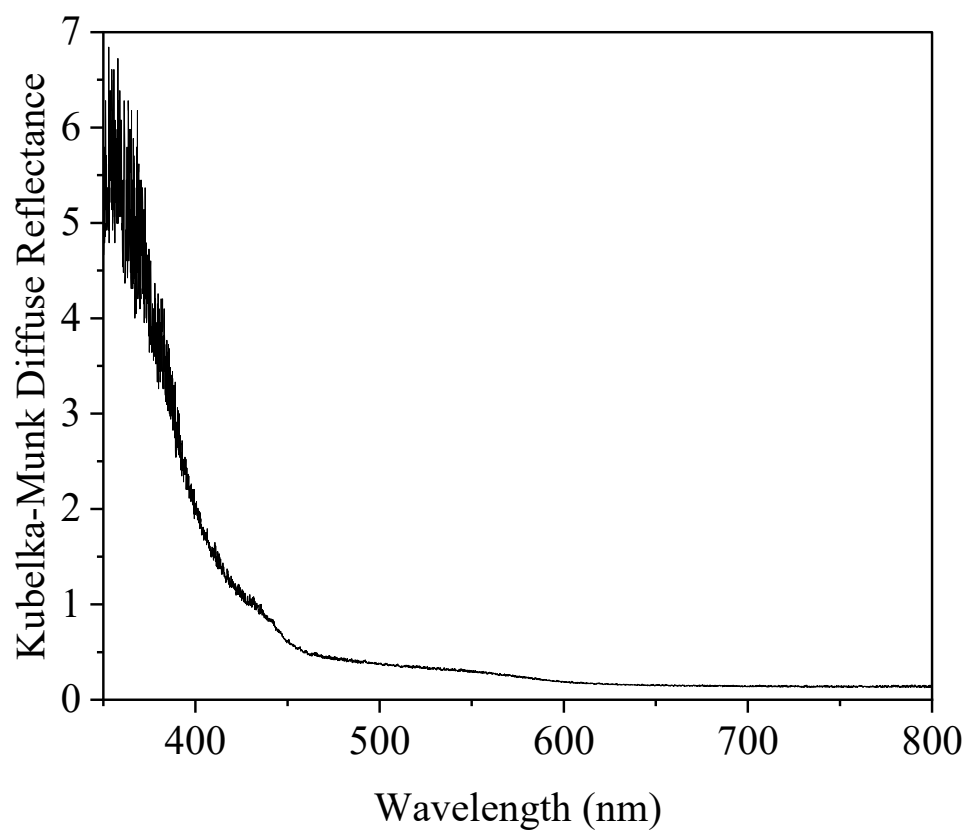

**Figure S3.** Kubelka-Munk diffuse reflectance spectrum of KInP<sub>2</sub>S<sub>7</sub>.

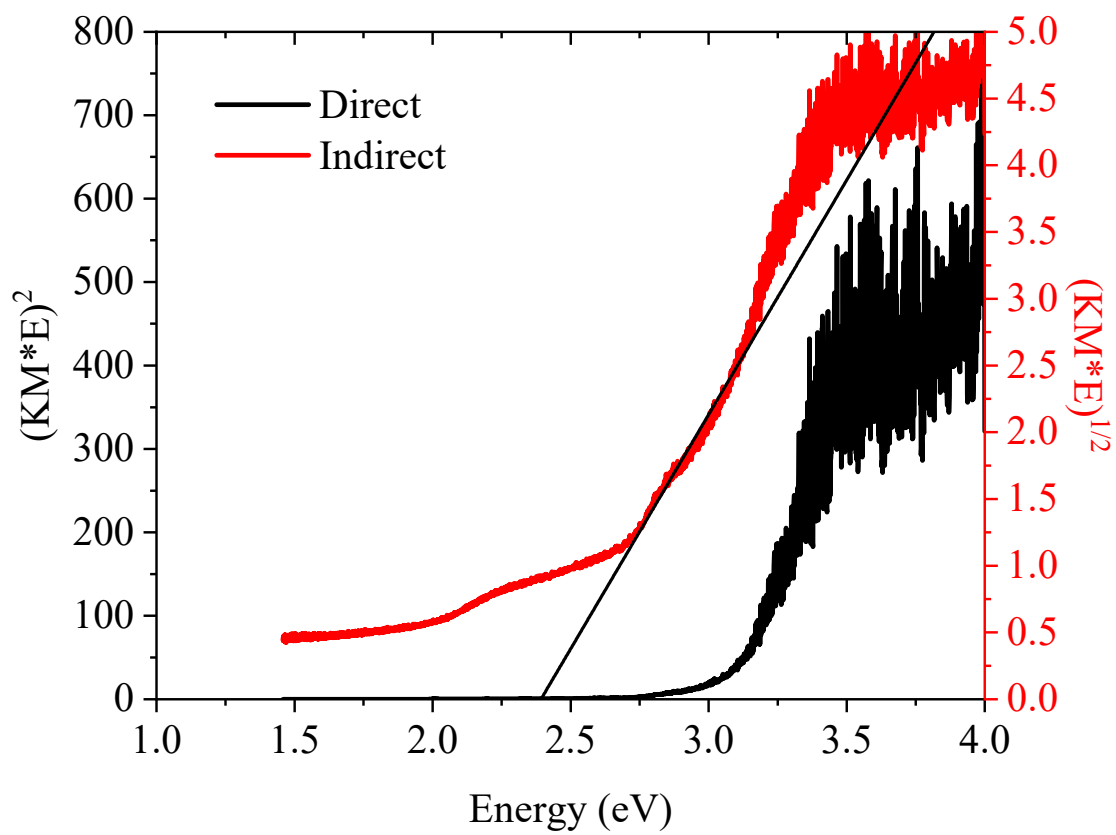

**Figure S4.** Tauc plots for allowed direct and indirect transitions of KInP<sub>2</sub>S<sub>7</sub>.

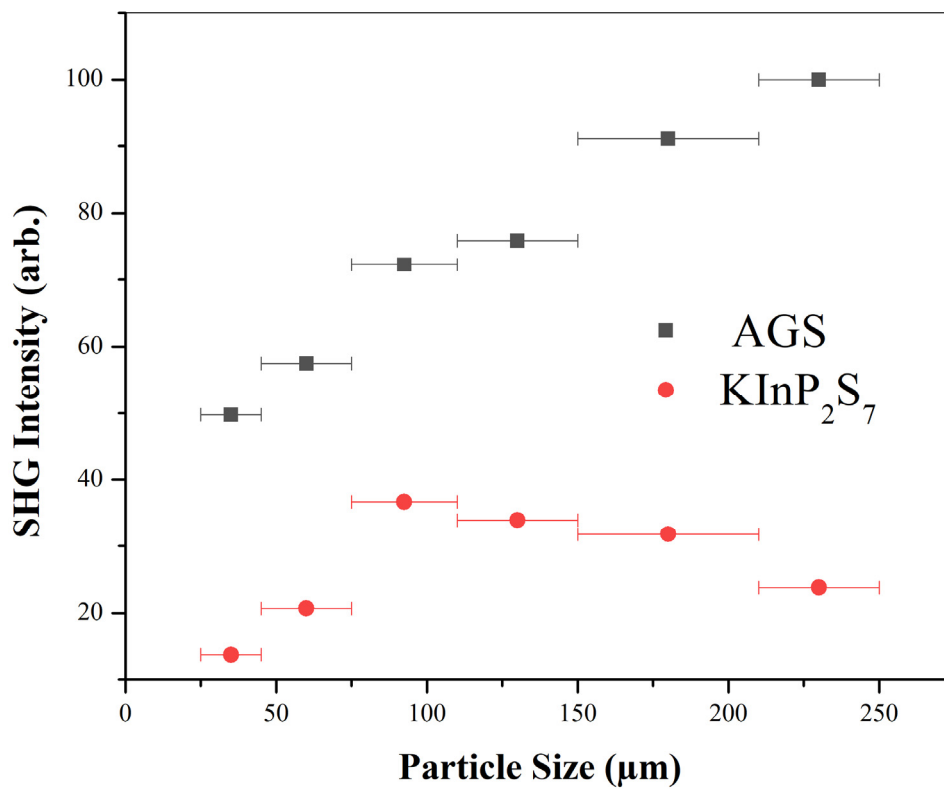

**Figure S5.** SHG intensities of KInP<sub>2</sub>S<sub>7</sub> and AgGaS<sub>2</sub> @2.09 μm measured at variable particle size samples.

**Table S1.** LDT measurement results of KInP<sub>2</sub>S<sub>7</sub> and AgGaS<sub>2</sub> @ 1064 nm measured at samples of particle size of 225 μm.

|                                  | damage energy<br>(mJ) | spot diameter<br>(mm) | LDT<br>(MW/cm <sup>2</sup> ) | LDT (× AGS) |
|----------------------------------|-----------------------|-----------------------|------------------------------|-------------|
| AgGaS <sub>2</sub>               | 0.58                  | 0.5                   | 29.6                         | 1           |
| KInP <sub>2</sub> S <sub>7</sub> | 3.02                  | 0.5                   | 154                          | 5.2         |
